# Supplementary material for: Sensory Adaptations to Improve Physiological and Behavioral Distress During Dental Visits in Autistic Children: A Randomized Crossover Trial
Source: PubMed Central journal article supplement (PMC10238943; doi:10.1001/jamanetworkopen.2023.16346), 2023-06-02
Supplement: jamanetwopen-e2316346-s003.pdf [file jamanetwopen-e2316346-s003.pdf]

## Data Sharing Statement

Stein Duker. Sensory Adaptations to Improve Physiological and Behavioral Distress During Dental Visits in Autistic Children. *JAMA Netw Open*. Published June 02, 2023.

doi:10.1001/jamanetworkopen.2023.16346

### Data

**Data available:** Yes

**Data types:** Deidentified participant data

**How to access data:** Deidentified data and a data dictionary will be provided to interested parties after the publications and research presentations that address the specific aims and major secondary analyses of the study are completed. Contact [lstein@chan.usc.edu](mailto:lstein@chan.usc.edu)

**When available:** beginning date: 06-01-2024

### Supporting Documents

**Document types:** None

### Additional Information

**Who can access the data:** Researchers whose proposed use of the data has been approved.

**Types of analyses:** Any purpose.

**Mechanisms of data availability:** After approval of a proposal.
